# Supplementary material for: Environmental DNA provides higher resolution assessment of riverine biodiversity and ecosystem function via spatio-temporal nestedness and turnover partitioning
Source: PubMed Central journal article supplement (PMC8093236; doi:10.1038/s42003-021-02031-2), 2021-05-03
Supplement: 42003_2021_2031_MOESM2_ESM.pdf [file 42003_2021_2031_MOESM2_ESM.pdf]

1 Environmental DNA provides higher resolution assessment of riverine biodiversity and ecosystem function via  
2 spatio-temporal nestedness and turnover partitioning

3

4 Mathew Seymour<sup>1\*</sup>, François K. Edwards<sup>2</sup>, Bernard J. Cosby<sup>3</sup>, Iliana Bista<sup>4,5</sup>, Peter M. Scarlett<sup>2</sup>, Francesca L.  
5 Brailsford<sup>6</sup>, Helen C. Glanville<sup>6</sup>, Mark de Bruyn<sup>7</sup>, Gary R. Carvalho<sup>6</sup>, Simon Creer<sup>6</sup>

6

7 1. Department of Ecology, Swedish University of Agricultural Sciences, Uppsala, Sweden

8 2. Centre for Ecology & Hydrology, Wallingford, United Kingdom

9 3. Centre for Ecology & Hydrology, Environment Centre Wales, Bangor, United Kingdom

10 4. Department of Genetics, University of Cambridge, Cambridge, United Kingdom

11 5. Wellcome Sanger Institute, Hinxton, United Kingdom

12 6. School of Natural Sciences, Bangor University, Bangor, United Kingdom

13 7. The University of Sydney, School of Life and Environmental Sciences, Sydney, Australia

14

15

16 Corresponding author; \*mathew.seymour@slu.se

17

18 Supplementary Figure 1. Visual illustration of the environmental PCA used to construct the environmental  
19 gradient (PC1). The colors indicate the landuse type of the respective points and correspond to the associated  
20 colors in Figures 1 and 2, with black = urban, green = agriculture, blue = forest, red = acid grasslands and  
21 brown = moorlands. Polygons are used to indicate landuse groups and are colored in the same manner as the  
22 points themselves.

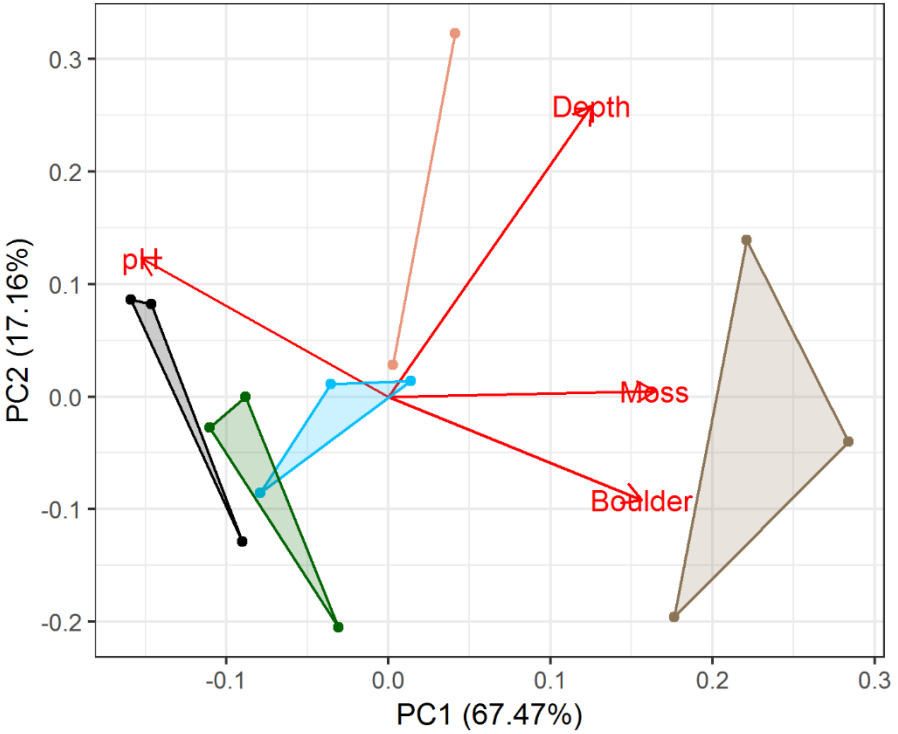

23  
24  
25
